# Supplementary material for: Molecular Cytogenetic Identification of Subgroups of Grade III Invasive Ductal Breast Carcinomas with Different Clinical Outcomes
Source: Oxford University Press journal article supplement (doi:10.1158/1078-0432.ccr-03-0731), 2004-09-15
Supplement: 10780432ccr030731-sup-ccr_9-15-04_jones.xls [file 10780432ccr030731-sup-ccr_9-15-04_jones.xls]

## Sheet: ck14.15may03
ICR.no	Diagnosis	Grade	ER	PR	ERBB2	CK14	CK19	Age	Size	Nodes	CGH mean	CGH gains	CGH losses
CK111	Invasive ductal carcinoma NST	3	negative	NA	negative	positive	positive	42	5	2/15	12	1p13-p31; 1q22-q32; 4q12-q28; 5q11-q23; 6q12-q23; 9q21-q24; 11q11-q21; 12q15-q21;	10q24-q25; 16p12-p13; 17p13; 17q11-q12
CK119	Invasive ductal carcinoma NST	3	negative	negative	negative	positive	positive	46	3.2	2/23	3	none	16p13; 16q22-q24, 19
CK127	Invasive ductal carcinoma NST	3	negative	NA	negative	negative	positive	32	1.5	0/17	9	1q41-q44; 3q26-q29; 20q	2p; 6p12-p21; 6q22-q24; 18q12-q22; 19p11-p13; Xq22-q27
CK138	Invasive ductal carcinoma NST	3	negative	NA	negative	negative	positive	41	NA	0/21	0	none	none
CK141	Invasive ductal carcinoma NST	3	positive	positive	negative	negative	positive	48	2	11/22	3	17q12; 17q24; 20q13	none
CK142	Invasive ductal carcinoma NST	3	negative	negative	positive	positive	positive	55	2.7	0/27	6	2p11; 7q32; 8p12-p22; 12p	7q36; 12q24
CK149	Invasive ductal carcinoma NST	3	negative	positive	negative	positive	positive	44	2.5	1/25	4	4p16; 9q34; 17q24-q25; 20q13	none
CK150	Invasive ductal carcinoma NST	3	negative	NA	positive	negative	positive	47	3	0/23	4	5q33-q35; 20q	15q21-q24; 18q11-q21
CK153	Invasive ductal carcinoma NST	3	negative	NA	negative	negative	positive	45	2	1/38	11	9q34; 17q12; 17q24; 18p; 20	4p14-p15; 4q21-q33; 5p14; 5q14-q33; 15q15-q21; 18q12
CK174	Invasive ductal carcinoma NST	3	negative	NA	negative	negative	positive	42	3.5	0/26	7	6p12-p22; 8q24	1q25-q31; 2p; 2q21-q34; 8q21-q23; 13q21-q31
CK176	Invasive ductal carcinoma NST	3	negative	NA	negative	positive	positive	29	1	1/50	5	none	16p; 17q24; 19; 20p; 22q
CK179	Invasive ductal carcinoma NST	3	negative	negative	negative	positive	positive	44	3	0/34	5	7p15-p22	4q31-q34; 10p14-p15; 11p15; 15q26
CK180	Invasive ductal carcinoma NST	3	negative	negative	negative	positive	positive	72	4	2/26	2	none	17p13; 22q
CK183	Invasive ductal carcinoma NST	3	negative	NA	negative	positive	positive	59	4	0/19	11	4q12-q21; 7p21; 7q11-q21; 7q31-q32; 9q13-q21;	1p36; 18q21-q23; 21q13; Xp; Xq12-q13; Xq23-q28
CK191	Invasive ductal carcinoma NST	3	negative	negative	negative	positive	positive	47	3	0/22	12	1q; 2q21-q23; 4q	1p32-p36; 2p23-p25; 6p21; 6p23-p25; 16q22-q24; 17; 19; Xp11-p21; Xq
CK195	Invasive ductal carcinoma NST	3	positive	positive	negative	negative	positive	41	8	0/35	9	9p21-p24; 12p11	2q37; 7q36; 9q31-q34; 12q24; 16q22-q23; 17q21-q22; 20q13
CK201	Invasive ductal carcinoma NST	3	negative	negative	negative	positive	positive	46	2.2	0/29	3	none	16p, 17p13; 19q
CK205	Invasive ductal carcinoma NST	3	negative	negative	positive	negative	positive	59	3.5	0/22	27	2q21-q24; 3p; 3q22-q26; 5q11-q21; 7p11-p21; 7q11-q31; 8p; 8q11-q21; 13q12-q31; 14q11-q22; Xp22	1p32-p36; 2p23-p25; 6p; 8q24; 9q22-q34; 16q22-q24; 17; 19; 20p11; 22q; Xp11; Xq
CK212	Invasive ductal carcinoma NST	3	positive	positive	negative	negative	positive	51	3	1/35	21	2; 6p; 7p; 13q12-q21; 13q31-q34; 14q; 15q; 17; 20; 21q	1p13-p32; 3p; 3q11-q25; 4; 5p13-p14; 5q11-q33; 8p; 8q11-q23; 9p; 9q13-q34; 16q; 18; 19q; 22q
CK236	Invasive ductal carcinoma NST	3	negative	positive	NA	positive	positive	49	4	0/35	27	1q; 2q21-q32; 7p11-p21; 8p; 8q11-q23; 13q12-q31; 14q11-q24;	1p31-p36; 6p12-p2; 8q24; 11q13-q22; 12p12; 12q24; 12q21; 15q22-q26; 16p13; 16q22-q24; 17p13; 17q; 19; 21q22; 22q; Xp11-p21; Xq
CK243	Invasive ductal carcinoma NST	3	negative	positive	negative	negative	positive	28	4	4/40	5	8q11-q22; 17q24	3p22-p25; 11q22-q23; 17p13
CK247	Invasive ductal carcinoma NST	3	negative	negative	negative	positive	positive	59	4	3/30	17	1p12-p31; 1q31-q32; 1p11-p12; 1q21-q33; 4q12-q33; 6q12-q13; 6q21-q23;	5q31; 6q25-q27; 16p; 16q; 17p; 18q22-q23; 19p13; 20p13; 21q13; 22q
CK249	Invasive ductal carcinoma NST	3	positive	positive	negative	negative	positive	71	3.5	0/15	8	5q23-q35; 8p21-p23; 19; 20	2q33-q37; 4q26-q32; 13q32-q34; Xq
CK250	Invasive ductal carcinoma NST	3	positive	negative	negative	positive	positive	43	3.5	0/29	3	none	11p15; 19q; Xp22
CK263	Invasive ductal carcinoma NST	3	positive	positive	negative	negative	positive	52	4	7/36	10	1q32-q44; 3q26-q29; 17q; 20q	4q24-q31; 5q14-q23; 7q22-q31; 8q23-q24; 13q21-q22; 21q
CK265	Invasive ductal carcinoma NST	3	positive	negative	negative	positive	positive	55	2	0/12	7	3p24; 6q21	1p32-p36; 2p23-p25; 3q27-q29; 16p; 17q
CK270	Invasive ductal carcinoma NST	3	negative	negative	negative	positive	positive	41	4.5	11/27	0	none	none
CK272	Invasive ductal carcinoma NST	3	negative	negative	negative	positive	positive	56	3	0/17	11	1p13; 1q43-q44; 2p; 3q29; 7p12-p13	3p25; 11p15; 16q22-q24; 17q24; 19q, 20p
CK283	Invasive ductal carcinoma NST	3	negative	NA	negative	positive	negative	54	4	0/17	0	none	none
CK284	Invasive ductal carcinoma NST	3	positive	negative	negative	positive	positive	62	1.5	1/9	10	5q12-q32; 6q21-q23; 7q11	1p36; 17p13; 17q24-q25; 21q13; 22q; Xp; Xq26-q27
CK289	Invasive ductal carcinoma NST	3	positive	positive	positive	negative	positive	49	4.5	1/30	5	20	3q24-q25; 6q22; 15q23-q24; X
CK290	Invasive ductal carcinoma NST	3	negative	negative	negative	positive	positive	28	3.5	15/32	4	none	17q22-q24; 19; 20p; Xp22
CK299	Invasive ductal carcinoma NST	3	negative	NA	NA	positive	positive	46	6	23/29	2	3p23-p24; 10q25	none
CK305	Invasive ductal carcinoma NST	3	positive	positive	negative	negative	positive	43	3.5	1/22	4	17q12; 17q24	4q28-q33; 13q21-q32;
CK308	Invasive ductal carcinoma NST	3	negative	NA	negative	positive	positive	40	4.5	0/22	3	none	16q; 17q22-q24; 19p
CK309	Invasive ductal carcinoma NST	3	positive	negative	negative	negative	positive	55	4	0/32	12	10p14-p15; 18p11	1p32-p36; 6p23-p25; 7p21-p22; 8p21-p23; 8q22-q24; 9q31-q34; 16q22-q24; 19q13; 20q13
CK319	Invasive ductal carcinoma NST	3	negative	negative	negative	positive	positive	51	5.5	3/19	0	none	none
CK329	Invasive ductal carcinoma NST	3	negative	negative	negative	positive	positive	36	1.5	2/21	0	none	none
CK330	Invasive ductal carcinoma NST	3	positive	positive	negative	negative	positive	55	4.5	5/15	10	2p14-p21; 2q22-q32; 3p12; 4q12-q26; 5p13-p14; 5q11-q14; 14q11-q14	1p32-p36; 2q36-q37; 7q34-q36
CK331	Invasive ductal carcinoma NST	3	negative	negative	negative	positive	positive	41	3	0/10	6	9q33-q34; 20q; 21q	16q; 17q22-q24; 19q
CK347	Invasive ductal carcinoma NST	3	negative	negative	negative	positive	positive	55	2	0/40	15	11q12-q13; 17p; 17q; 20q; 21q22	2q22-q32; 3p12-p13; 3q13; 3q22-q26; 5p13-p14; 5q14-q15; 6q12-q16; 18q12-q21; Xp11-p22; Xq13-q26
CK356	Invasive ductal carcinoma NST	3	negative	negative	positive	negative	positive	54	5	39/39	4	17p13; 17q12; 17q24; 20q	none
CK367	Invasive ductal carcinoma NST	3	negative	NA	negative	positive	positive	45	1.5	1/31	14	1q; 3q22-q29; 8q11-q21; 11q14-q22; 13q14-q31; 14q11-q34	1p32-p36; 5q34-q35; 8q24; 9q31-q34; 16q22-q24; 17p13; 17q; 19; 22q
CK368	Invasive ductal carcinoma NST	3	negative	positive	positive	positive	positive	47	3.5	2/41	7	7p21-p22; 8q22-q24	7p36; 8p12-p24; 16p; 17p13; 19q
CK375	Invasive ductal carcinoma NST	3	positive	positive	positive	negative	positive	44	2	1/21	4	1q41-q44; 20q	7p13-p14; 13q14-q22
CK378	Invasive ductal carcinoma NST	3	positive	negative	negative	positive	positive	41	1.5	1/30	2	2q23-q25; 4q32-q35	none
CK379	Invasive ductal carcinoma NST	3	positive	positive	negative	negative	positive	63	5.5	1/15	18	3p12; 4q12-q32; 6q12-q16; 9p	1p31-p36; 2p23-p25; 9q32-q34; 12p13; 12q22-q24; 14q24-q32; 15q22-q24; 16q22-q24; 17p; 17q21; 17q23-q25; 19p13; 20q13, 22q
CK380	Invasive ductal carcinoma NST	3	negative	NA	negative	positive	positive	23	2	0/39	0	none	none
CK390	Invasive ductal carcinoma NST	3	negative	negative	negative	positive	positive	40	2	36/41	2	8p21-p22; 20q	none
CK393	Invasive ductal carcinoma NST	3	negative	negative	negative	positive	positive	50	2.5	8/25	6	none	1p32-p36; 16q22-q24; 17q25; 19p13; 21q; Xp22
CK395	Invasive ductal carcinoma NST	3	positive	negative	negative	positive	positive	55	4	1/22	6	1q; 20q	16p; 17p13; 17q25; 18p11
CK398	Invasive ductal carcinoma NST	3	negative	negative	negative	positive	positive	40	4	0/26	3	3p24-p25	16q22-q24; Xp21-p22
CK403	Invasive ductal carcinoma NST	3	negative	positive	negative	negative	positive	48	4	31/31	7	17p13; 17q12; 17q24; 20q	2q14-q33; 3p12-p14; 18q12-q21
CK408	Invasive ductal carcinoma NST	3	negative	negative	positive	negative	positive	56	8	11/17	19	1q; 4p15-p16; 5q34-q35; 8q; 11q12; 11q23-q24; 20q; Xq26-q28	3p; 4q27-q33; 5p; 5q11-q23; 6q21-q24; 8p; 13q13-q31; 14q21; 15q12-q21; 17p13; 20p13
CK409	Invasive ductal carcinoma NST	3	positive	negative	negative	positive	positive	55	6	0/35	11	7q11; 10p13-p15; 16p13; 17q22-q24; 18p11; 20q13; 21q	6q22-q24; 18q22-q23; 19q
CK414	Invasive ductal carcinoma NST	3	negative	positive	positive	negative	positive	55	3.3	0/37	16	3p; 3q13-q21; 3q26-q29; 7q32-q36; 11q23-q24; 17p; 17q12; 17q22-q24; 20q	4q22-q32; 8p11-p12; 8q12-q21; 13q; 15q21-q26; 16q; 18q22
CK415	Invasive ductal carcinoma NST	3	positive	negative	negative	positive	positive	43	3	0/21	6	8q22-q24; 20q13	17q24; 19q; 20p13; 22q
CK416	Invasive ductal carcinoma NST	3	negative	positive	positive	positive	positive	29	6	0/31	5	20q13	9q34; 16p13; 17q25; 19p13
CK421	Invasive ductal carcinoma NST	3	positive	positive	positive	negative	positive	40	2.5	0/37	10	4q12-q31; 6q12-q23	1p32-p36; 9q34; 10q26; 12p13; 17p13; 17q24-q25; 19p; 22q
CK425	Invasive ductal carcinoma NST	3	negative	negative	negative	positive	positive	56	1.8	5/15	11	1p22-p31; 6q13; 8q21-q24; 9p13-p23	1p32-p36; 8p21; 9q33-q34; 12q23-q24; 16p; 17p13; 19
CK432	Invasive ductal carcinoma NST	3	positive	negative	positive	negative	positive	39	1.5	0/20	25	1q25-q32; 2q31-q32; 3q24-q25; 4p12-p15; 4q12-q26; 5p13-p14; 5q11-q14; 7q22-q31; 8q11-q22; 15q21; 20q13; Xp21; Xq22-q26	1p36; 8q24; 9q34; 10q25-q26; 11p15; 12p13; 12q24; 14q32; 19; 20p13; 22q13; Xp22
CK436	Invasive ductal carcinoma NST	3	positive	negative	NA	negative	positive	42	6	1/25	11	2p14-p21; 2q22-q32; 3p12; 4q12-q26; 5p13-p14; 5q11-q14; 14q11-q15	1p32-p36; 2q36-q37; 7q34-q37; 22q
CK439	Invasive ductal carcinoma NST	3	positive	positive	negative	negative	positive	56	3.5	0/25	4	17q12; 17q24; 20q13	12p11
CK440	Invasive ductal carcinoma NST	3	negative	negative	negative	negative	positive	46	3	0/21	7	11p15; 17p13; 17q12; 17q24	10q24-q25; 12q15-q21; 18q12-q21
CK447	Invasive ductal carcinoma NST	3	positive	positive	negative	negative	positive	56	2	15/39	29	1; 2p24-p25; 2q11-q21; 6p; 6q21-q27; 8p22; 12q24; 13q22-q34; 15q22-q24; 17q12-q21; 17q22-q24; 18p11; 19q; 20q13; 21q; 22q; Xq	2p11-p23; 3p12-p14; 3q; 4p; 4q12-q26; 5p; 5q11-q21; 7; 9p; 11p; 12q12-q21; 18q22
CK451	Invasive ductal carcinoma NST	3	positive	negative	negative	negative	positive	58	5	8/37	3	17q12-q21; 17q22-q24; 20q	none
CK453	Invasive ductal carcinoma NST	3	negative	negative	negative	negative	positive	59	3	15/32	0	none	none
CK456	Invasive ductal carcinoma NST	3	positive	positive	negative	negative	positive	40	1.5	3/30	7	2p24-p25; 2q36-q37; 10q25-q26; 12p13; 17p13; 19; 20q	none
CK464	Invasive ductal carcinoma NST	3	positive	negative	negative	negative	positive	46	3.8	11/20	2	17p; 20q13	none
CK471	Invasive ductal carcinoma NST	3	negative	negative	negative	positive	negative	40	5.5	2/37	3	18p	11q23-q25; 17p13
CK472	Invasive ductal carcinoma NST	3	negative	negative	negative	positive	positive	48	4	0/19	11	6p23-p25; 12p13; 15q22-q26; 17p12-p13; 20q13	2q23-q32; 3p12; 4p14; 4q13-q27; Xp11-p22; Xq13-q28
CK476	Invasive ductal carcinoma NST	3	positive	NA	negative	negative	positive	50	3	0/33	32	1q21-q31; 4p12-p15; 6p21; 6p23-p25; 7q31-q35; 8; 11p11-p13; 12p11-p12; 16q12-q22; 18; 19; 20; 22	1p32-p36; 1p13-p22; 2p15-p25; 2q22-q24; 3p; 3q21-q29; 4q22-q35; 5; 6q; 7p22; 9; 11p15; 11q22-24; 12q13-q24; 13q21-q34; 14q21-q24; 15q22-q24; 16q24; 17q22-q25
CK478	Invasive ductal carcinoma NST	3	negative	negative	negative	negative	negative	39	6.5	5/33	5	1q;	4p; 8p; 16p; 19p
CK497	Invasive ductal carcinoma NST	3	positive	positive	negative	negative	positive	40	1.2	1/27	4	10q25-q26; 12p13; 19; 20q	none
CK499	Invasive ductal carcinoma NST	3	positive	positive	positive	negative	positive	41	4	19/31	15	11q12-q13; 17p13; 17q12; 17q24; 20	4q13-q32; 5q14-q21; 6q12-q16; 8q13-q23; 12p11; 12q15-q21; 13q14-q22
CK518	Invasive ductal carcinoma NST	3	positive	positive	negative	negative	positive	29	3.8	9/38	12	6p11-p21; 8q22-q24; 9q34; 17p13; 17q12; 17q24; 20	7p14-p15; 7q31-q32; 11q23; 18q11-q22; Xp22
CK520	Invasive ductal carcinoma NST	3	negative	negative	negative	positive	positive	58	3	1/27	9	1p21-p22; 9p23-p24; 19p13	9q34; 11q12-q13; 17p12-p13; 17q24-q25; 18p11; 20p13
CK522	Invasive ductal carcinoma NST	3	positive	negative	positive	negative	positive	42	4.5	28/28	7	1q32-q44; 17q12-q21; 17q22-q24; 20; 22q	9p21-p23; 18q11-q21
CK524	Invasive ductal carcinoma NST	3	negative	negative	negative	positive	positive	43	3	0/18	3	9q34; 17q24-q25; 18q22	none
CK534	Invasive ductal carcinoma NST	3	negative	negative	negative	positive	positive	58	3	0/25	0	none	none
CK535	Invasive ductal carcinoma NST	3	negative	negative	negative	negative	positive	72	5	5/29	4	1q21-q23;	4p16; 8q24; 22q13
CK540	Invasive ductal carcinoma NST	3	positive	positive	positive	negative	positive	42	2	1/39	12	1q31-q44; 17q22-q24	2q21-q35; 3q22-q26; 6q21-q22; 9p21-p23; 9q21; 11p14; 11q14; 13q21-q32; Xq21-q26
CK549	Invasive ductal carcinoma NST	3	positive	negative	negative	negative	positive	55	1	14/29	18	6p21; 8q24; 9q32-q34; 20q; 21q; 22q	2p14-16; 2q22-q34; 4q12-q32; 5q14-q22; 6q12-q22; 8q22; 9p21-p23; 12q15-q21; Xq13-q25
CK552	Invasive ductal carcinoma NST	3	negative	negative	NA	negative	positive	43	2.5	0/30	1	20	none
CK558	Invasive ductal carcinoma NST	3	negative	negative	negative	negative	positive	54	2	7/27	6	17q12; 17q22-q24; 20q13	2p21-p23; 3p12-p21; 5q32-q33
CK559	Invasive ductal carcinoma NST	3	negative	negative	negative	positive	negative	71	4.5	NA	10	4q12-q28; 7q11-q31; 8q11-q21	1p31-p36; 2p22-p25; 2q34-q37; 9q21-q34; 22q; Xp; Xq12-q27
